# 1 An evaluation model for aboveground biomass based 2 on Hyperspectral Data from field and TM8 in Khorchin 3 grassland, China

4 Xiaohua Zhang<sup>1,2‡</sup>, Meirong Tian<sup>2\*</sup>, Xiuli Chen<sup>3‡</sup>, Yongjun Fan<sup>3</sup>, Jianjun Ma<sup>4</sup>, Danlu Xing<sup>2</sup>

5 1 College of Applied Meteorology, Nanjing university of Information Science & Technology, Nanjing, China;

6 2 Nanjing Institute of Environmental Science, Ministry of Ecology and Environment of China, Nanjing, China;

7 3 Baotou Teacher's college, Biological Science and Technology Institute, Baotou, Inner Mongolia, China;

8 4 College of Life Science, Lang Fang Normal University, Lang fang, China;

9 ‡ *These authors are co-first authors on this work.*

10 \* [tmr@nies.org](mailto:tmr@nies.org)

## 11 Abstract

12 Biomass is an important indicator for monitoring vegetation degradation and productivity. This  
13 study tests the applicability of Hyperspectral Remote-Sensing in situ measurements for  
14 high-precision estimation aboveground biomass (AGB) on regional scales of Khorchin grassland  
15 landscape in Inner Mongolia, China. Field experiments were carried out which collected  
16 hyperspectral data with a portable visible/NIR hyperspectral spectrometer (SOC 710), and  
17 collected aboveground net primary productivity (ANPP). Ground spectral models were then  
18 developed to estimate ANPP from the normalized difference vegetation index (NDVI), which was  
19 measured in the field following the same method as that of the Thematic Mapper(TM) from the  
20 Landsat 8 land imager (TM\_NDVI). Regression analysis was used to assess the relationship  
21 between ANPP and NDVI based on coefficients of determination ( $R^2$ ) and error analysis. The  
22 estimation of ANPP had unique optimal regression models. By comparing the different spectral  
23 inversion models, we selected an exponential model associating ANPP with NDVI (ANPP =  
24  $12.523 \times e^{3.370 \times (0.462 \times TM\_NDVI + 0.413)}$ , standard error = 24.74 g m<sup>-2</sup>,  $R^2 = 0.636$ ,  $P < 0.001$ ).  
25 This study suggests that the model can be used to monitor the condition and estimate the  
26 productivity of grassland at regional scales. The results still show a high potential to map  
27 grassland degradation proxies on the ground hyperspectral model. Thus, this study presents  
28 biomass hyperspectral inversion technology to remotely detect and monitor grassland degradation  
29 and productivity at high precision.

30 **Key words:** Biomass, Field hyperspectral, Remote sensing, Khorchin

## 31 Introduction

32 The tools for remotely sensing of vegetation have evolved significantly in recent decades[1], and  
33 spectral imaging has become increasingly popular in remote-sensing research for correlating  
34 spectral data with the biophysical properties of vegetation. Hyperspectral remote-sensing data  
35 have subsequently been widely used to estimate vegetation biomass[2-5], vegetation cover  
36 (VC)[6-7], nitrogen content[8], and the leaf area index of vegetation[1,9].

37 The accurate estimation of aboveground net primary productivity (ANPP) is an active area of  
38 research and can provide valuable information about the productivity and ecosystem service value

39 of grassland [10]. ANPP is an important impact factor for desertification and are often used as  
40 indicators for monitoring and evaluating grassland productivity and degradation [11]. The present  
41 study aimed to develop models for estimating biomass and VC based on satellite data, which  
42 allow an assessment over large areas at a low cost [12]. Desertification in the Khorchin grassland  
43 is becoming worse with the rapid expansion of the population, overgrazing and the warmer and  
44 drier trend associated with climate change [13]. The accurate estimation of the biomass of the  
45 grassland over large areas using remotely sensed data is thus very important for monitoring  
46 desertification and for improving the scientific management of grassland ecological resources.

47 Remote-sensing data have been transformed and combined into various spectral vegetation indices  
48 that are used as predictors of parameters, such as the normalised difference vegetation index  
49 (NDVI), ratio vegetation index, perpendicular vegetation index, soil adjusted vegetation index,  
50 and transformed soil adjusted vegetation index [14-17]. Most studies apply NDVI because it  
51 minimises the effects of topography[18] and is more reliable for the estimation of biomass of  
52 ecosystems/habitats dominated by grasses when the grasses are actively growing [9,19]. The  
53 NDVI is thus widely used to characterise grass ecosystems and to estimate biomass and  
54 VC[3,4,19-23].

55 NDVI have been determined from data sets collected by various satellite instruments, such as the  
56 Landsat Thematic Mapper (TM), the National Oceanic and Atmospheric  
57 Administration/Advanced Very High Resolution Radiometer (NOAA/AVHRR), MODIS,  
58 Gaofen-2 and the Moderate Resolution Imaging Spectro radiometer[9,24]. The Landsat 8 with  
59 narrowband indices are highly suitable to be chosen to map AGB accurately, because the  
60 narrowband indices have led to significant improvements in the predictive capability of models,  
61 and hyperspectral data from aerial imagery or field spectrometry have the potential to estimate the  
62 biophysical properties of rangeland or steppe vegetation with a greater accuracy than broadband  
63 indices [3,4,23,25-26].

64 In order to improve the accuracy of biomass estimation, the measurements of ground reflectance  
65 have been used to estimate biomass in grasslands and steppes since the 1970s [27], but ground  
66 spectral reflectance can be influenced by variable factors of the landscape such as the distribution  
67 of plant communities [28], soil colour [29], hydrology[30], and topography[31], and sensor  
68 radiance may be strongly affected by atmospheric scattering[32]. For these reasons, various  
69 regression models have been established for associating vegetation indices with biomass in  
70 different areas. Relationships have been established between remote-sensing data and the  
71 biophysical properties of vegetation, mostly linear or non-linear, that have greatly improved the  
72 accuracy of biomass estimates and that have determined patterns of grassland productivity in  
73 various regions [6,33-37].

74 Taking into account the advantages and disadvantages of the current remote sensing sources to  
75 estimate AGB, In this study, we present a remote sensing approach for estimating and monitoring  
76 AGB in meadows and pastures during the growing season. We used remote sensing of Landsat 8  
77 and ground hyperspectral to calculate the normalized difference vegetation index (NDVI), and  
78 on-field aboveground net primary production (ANPP) measurements to establish an empirical  
79 exponential model to estimate spatial ANPP across the entire Khorchin grassland.

80 The main objectives of this study are: (i) to analyse the relationship of the ground narrowband  
81 NDVI with ANPP and then to develop the most suitable ground spectral models for evaluating  
82 ANPP over a large area of the Khorchin steppe, and (ii) to use the ANPP model to understand the

83 biocapacity of the Khorchin grassland for providing technical support for determining a  
84 reasonable grazing intensity and guiding the development of the livestock industry.

## 85 **Materials and methods**

### 86 **Study area**

87 The Khorchin grassland is located in the eastern section of the ecotone between crop production  
88 and animal husbandry, we choose the region of Bairin Youqi in Inner Mongolia of China as the  
89 study area (Fig. 1), which is an important component of the Khorchin grassland and is typically  
90 sensitive and fragile. Bairin Youqi has a semiarid, temperate, continental monsoon climate with  
91 mean annual temperature of 4.9 °C and mean annual precipitation of 358 mm (precipitation is less  
92 than evaporation). From low to high elevations, the distribution of vegetation is meadow, sandy  
93 vegetation, and low mountain grassland respectively. The dominant grassland species include  
94 *Achnatherum splendens* (Trin.) Nevskia, *Stipa capillata* Linn., *Leymus chinensis* (Trin.) Tzvel.,  
95 and *Agropyron cristatum* (Linn.) Gaertn.

#### 97 **Fig. 1 Map of Inner Mongolia (left) and the location of the sampling sites in Bairin Youqi (right)**

98 This study was carried out in the field of Khorchin grassland which was State-owned Land and did not  
99 involve endangered or protected species. Meanwhile, because this study supported by National  
100 Environmental Conservation Research Program, so the government of Bairin Youqi permitted and  
101 approved this study.

### 102 **Collection of field data**

#### 103 **Experimental setup**

104 Field work was conducted during 15-30 July 2016, coinciding with the most productive period of  
105 vegetational growth. Based on the topography and land use, 39 plots were established that  
106 included large, homogeneous patches of vegetation and representative vegetational communities  
107 with different types of vegetation. The plot size was set at 30 × 30 m, equivalent to the size of a  
108 TM8 pixel. The plots contained a total of 173 quadrats of 1 × 1 m. The data collected were divided  
109 into 2 groups. Group one, which contained 153 quadrats were used to build the ground spectral  
110 model; group two, which contained 20 quadrats, were used for the accuracy test of the spectral  
111 inversion model. Meanwhile, within group one, the data of approximately two thirds of the total  
112 quadrats (n=115) were chosen randomly to build the model while the rest were used for testing the  
113 terrain model in terms of selecting the best fitting function and precision.

#### 114 **Field spectral data**

115 The field data were collected using the SOC710 Hyperspectral Imaging System which  
116 Manufactured by Surface Optics Corporation in America. The SOC710 is a precision instrument  
117 with an integrated scanning system and analysis software that can quickly obtain high-quality  
118 hyperspectral images at visible to near-infrared (NIR) wavelengths in the range 0.4-1.0 μm. The  
119 system can be used under normal lighting conditions at variable exposures and gains. The SOC  
120 spectra were collected with a 10° field of view and at 1.2 m above the grass canopy. All spectral

121 measurements were collected between 9:00 and 15:00 Beijing time under clear skies. Three  
122 measurements were taken for each sample of grass canopy. These spectra were standardised to  
123 spectra measured at approximately 10-minute intervals with a white board. The average of three  
124 replicates for each sample was used for the analysis.

## 125 **Biomass measurements**

126 After the spectral data had been recorded, the standing biomass was collected in the quadrats at  
127 each sample location. The fresh weight of green herbaceous material was recorded soon after  
128 clipping, the samples were then dried at 80 °C for 10-12 hours, and the dry masses of the samples  
129 were determined.

## 130 **Image data acquisition, satellite data, and preprocessing**

131 Biomass was assessed using TM8 data from the Landsat 8 land imager of the United States  
132 Geological Survey. The satellite data were acquired within the same time frame in which the field  
133 data had been collected, and the images were free of clouds and haze. Four suitable TM8 satellite  
134 scenes at PATH/ROWS 123/29, 123/30, 122/29, and 122/30 were analysed. The satellite data were  
135 geometrically rectified by a digital elevation model and ground-control points from Land Survey.  
136 The four TM8 scenes were processed for atmospheric correction with the Fast Line-of-sight  
137 Atmospheric Analysis of Spectral Hypercubes software package.

## 138 **Data analysis**

### 139 **NDVI calculation**

140 NDVI are commonly calculated from RED and NIR reflectance data [38]. We calculated the  
141 SOC\_NDVI of the samples from SOC710 spectral reflectance using the ENVI 5.0 image analysis  
142 software. The method for calculating NDVI was the same as that used for calculating the  
143 TM\_NDVI:

$$144 \quad NDVI = \frac{NIR - RED}{NIR + RED} \quad (1)$$

145 Where the RED and NIR bands correspond to wavelengths of 630-680 and 845-885 nm,  
146 respectively. Spectral reflectance data should be resampled within the scope of the RED and NIR  
147 bands.

### 148 **Regression analyses**

149 The regression analyses were carried out for the scatter diagrams of ANPP vs. SOC\_NDVI, and  
150 SOC\_NDVI vs. TM\_NDVI. In study area, The 173 quadrats data were employed to obtain the  
151 regression model for ANPP vs. SOC\_NDVI. Mean value of NDVI within a specific plot was  
152 calculated, and then the data of the total 39 plots (Fig. 1) were used in the regression analysis for  
153 SOC\_NDVI vs. TM\_NDVI.

154 The coefficient of determination ( $R^2$ ) and the adjusted  $R^2$  were used to test the strength and  
155 significance of the relationships between the field data and the corresponding data extracted from  
156 the satellite scenes. The standard error (SE, Eq. 2) of the prediction based on the independent test

157 data and the coefficient of mean error (MEC, Eq. 3) were calculated to assess the accuracy of the  
 158 developed models.

$$159 \quad SE = \sqrt{\frac{\sum_{i=1}^n (y - y')^2}{n}} \quad (2)$$

$$160 \quad MEC = \frac{\sum_{i=1}^n \left| \frac{y - y'}{y} \right|}{n} \quad (3)$$

161 where  $y$  is a measured biomass,  $y'$  is an estimated biomass for the test data, and  $n$  is the number of  
 162 samples.

## 163 Results

### 164 Optimal ground spectral models and tests of model accuracy

#### 165 The optimal ground spectral models for biomass

166 From the analysis and evaluation of the relationships between ANPP and SOC\_NDVI computed  
 167 from reflectance data obtained by the SOC710 in the field, we chose linear, logarithmic, power,  
 168 and exponential functions to fit and optimise the regression equations for selecting the best  
 169 regression model (Fig.2).

170

171 **Fig.2 The Simulation Curves of the Regression Equation of the Training Samples**

172 The relationships between ANPP and SOC\_NDVI was significant ( $P < 0.001$ ) for all functions  
 173 and met the assumptions of the statistical analyses. The exponential model was superior for ANPP,  
 174 with an  $R^2$  of 0.636, indicated by bold type in Tables 1.

175 **Table 1** Comparison of the regression equations between ANPP and SOC\_NDVI.

|                  | Linear                   | Logarithmic                   | Power                    | Exponential                     |
|------------------|--------------------------|-------------------------------|--------------------------|---------------------------------|
| $n$              | 115                      | 115                           | 115                      | 115                             |
| Equation         | $y = 443.297x - 166.610$ | $y = 284.562\ln(x) + 248.525$ | $y = 299.611x^{2.216}$   | $y = \mathbf{12.523e^{3.370x}}$ |
| $R^2$            | 0.617                    | 0.579                         | 0.626                    | <b>0.636</b>                    |
| Adjusted $R^2$   | 0.614                    | 0.575                         | 0.623                    | 0.633                           |
| $F(\alpha=0.01)$ | 182.255 ( $P < 0.001$ )  | 155.181 ( $P < 0.001$ )       | 802.5746 ( $P < 0.001$ ) | 1089.7635 ( $P < 0.001$ )       |

176 Note:  $n$ , number of samples;  $R^2$ , coefficients of determination; the best regression model is highlighted in bold.

#### 177 Tests of model accuracy

178 The accuracy of the models was tested to obtain the best regression models. We used test sets of  
 179 all field samples to analyse and evaluate the errors in the regression models (Table 2). A  
 180 comparison of the predictive performances of the regression equations indicated by SE and MEC  
 181 are presented in Table 2.

182 **Table 2** Comparison of the errors of the regression equations.

|  | Linear | Logarithmic | Power | Exponential |
|--|--------|-------------|-------|-------------|
|--|--------|-------------|-------|-------------|

|             |                        |       |       |       |              |
|-------------|------------------------|-------|-------|-------|--------------|
| <i>ANPP</i> | <i>n</i>               | 38    | 38    | 38    | 38           |
|             | SE (gm <sup>-2</sup> ) | 52.64 | 55.46 | 51.32 | <b>49.22</b> |
|             | MEC (%)                | 34.77 | 37.09 | 31.64 | <b>30.01</b> |

183 Note: *n*, number of samples; SE, standard error of prediction; MEC, coefficient of mean error; the SE and MEC of  
 184 the best regression model for each vegetational parameter are highlighted in bold.

185

186 We determined the best models for ANPP based on  $R^2$  and the independent validations. The  
 187 exponential equation was optimal for ANPP ( $R^2 = 0.636$ , SE = 49.22gm<sup>-2</sup>, MEC = 30.01%; Tables  
 188 1 and 2). Models with the following equations (Eqs. 4) were selected and used as the optimal  
 189 ground spectral models for ANPP of the entire Khorchin grassland:

190 
$$ANPP = 12.523 * e^{3.370 * SOC\_NDVI} \quad (4)$$

### 191 **The relationship between TM\_NDVI and SOC\_NDVI**

192 The linear regression equation was selected based on the analysis of the TM\_NDVI/SOC\_NDVI  
 193 scatter plot. The relationship between TM\_NDVI and SOC\_NDVI was significant, with an  $R^2$  of  
 194 0.656 ( $P < 0.001$ ) and met the assumptions of the statistical analyses (Table 4, Fig.3). The model  
 195 with the following equation (Eq. 5) was selected for the relationship between TM\_NDVI and  
 196 SOC\_NDVI for the entire Khorchin grassland:

197 
$$SOC\_NDVI = 0.462 * TM\_NDVI + 0.413 \quad (5)$$

198 **Table 3** Regression equations between TM\_NDVI and SOC\_NDVI.

| Equation         | <i>n</i> | <i>R</i> | $R^2$ | <i>F</i> ( $\alpha=0.01$ ) |
|------------------|----------|----------|-------|----------------------------|
| $y=0.462x+0.413$ | 39       | 0.810    | 0.656 | 70.63, $P < 0.001$         |

199 Note: *n*, number of samples; *R*,  $R^2$ , coefficients of determination.

200

201 **Fig. 3 Fitted curve of the best model for the relationship between SOC\_NDVI and**  
 202 **TM\_NDVI.**

203

### 204 **Spectral inversion models**

205 The spectral inversion models of TM8 for ANPP was calculated by Eqs. 4-5:

206 
$$ANPP = 12.523 * e^{3.370 * (0.462 * TM\_NDVI + 0.413)} \quad (6)$$

207 To test the agreement between measured and predicted values, we applied Eqs. 6 to the TM8  
 208 NDVI greyscale image and obtained the patterns of ANPP distribution in the study area by grid  
 209 computing. The test data sets were then converted into vector diagrams defined by geographic  
 210 coordinates by geographic information system. The values at the test points were recorded in the  
 211 distribution patterns as the corresponding pixels predicting values of ANPP. The relationship  
 212 between actual and predicted values was used to evaluate the accuracy of model.

213 The correlation between the predicted and actual values was significant, as were the independent  
 214 validations for predicting biomass (SE = 24.74, MEC = 18.61%; Fig.4). This study suggested that  
 215 the spectral inversion models could be used to monitor grassland biomass at regional scales.

216

217 **Fig. 4 Independent validation for predicting biomass ( $n = 20$ ,  $P < 0.001$ ). SE, standard error of**

218 **predicted biomass; MEC, coefficient of mean error.**

## 219 **Discussion**

220 The main goal of this study was to establish more accurate models for estimating ANPP of the  
221 grassland in Khorchin. We chose the NDVI vegetation index, which can be calculated from  
222 spectral reflectance data acquired in the field and from data from Landsat TM7 Band 4 (TM4;  
223 760-900 nm) and Band 3 (TM3; 630-690 nm) or from NOAA/AVHRR Channel 1 (580-680 nm)  
224 and Channel 2 (720-1100 nm)[39-41]. In a previous study, we also calculated the NDVI from data  
225 collected by a FieldSpec3 spectroradiometer (Analytical Spectral Devices, Boulder, USA), at  
226 spectral reflectances of 620-670 (RED) and 841-876 (NIR) nm [9]. To further improve the  
227 accuracy in the present study, we chose satellite data from Landsat 8(TM8), which have a higher  
228 geometric precision and signal-to-noise ratio than the other Landsat data, and used the SOC710  
229 Hyperspectral Imaging System, which is more accurate than the FieldSpec3 spectroradiometer.  
230 The TM8 remotely sensed imaging data were only released in 2013, so they have not yet been  
231 widely applied to monitor vegetational biomass. This study applied the field data for monitoring  
232 the vegetation, thereby providing an informational baseline for this study area. The spectral  
233 inversion model was ideal, indicating that TM8 remote imaging can be used for research on  
234 vegetation biomass on a regional scale.

235 ANPP have their own optimal regression models based on the processing and statistical analysis  
236 of experimental data in the study area. The optimal equations for the estimation of ANPP (Fig.5)  
237 indicate that the relationship between SOC\_NDVI and ANPP weakens at biomass  $>350 \text{ g m}^{-2}$  for  
238 grassland. Estimates of biomass above these levels are inaccurate or unreliable and may be  
239 affected by the NDVI lower saturation phenomenon in areas of dense vegetation cover. When  
240 biomass exceed these levels, factors such as grass height and leaf area index must be considered,  
241 or a modified SOC\_NDVI should be derived[42].

242

243 **Fig. 5 Fitted curve of the best model for the relationship between ANPP and SOC\_NDVI for**  
244 **the calibration sets**

245 The ground spectral models for ANPP can be applied to TM8 images, because measured spectral  
246 characteristics of plants on the ground are intrinsically linked to those obtained by TM8 remote  
247 sensing. Grassland yield over large areas can be estimated based on the ground spectral model.  
248 The models, however, could be more accurate if field and satellite data are collected over several  
249 years rather than only for one year. Also, the field and satellite data should be acquired at the same  
250 time for maximal correspondence. In future field experiments, we will assess the collective  
251 influence of these vegetational characteristics and the NDVI on biomass prediction and will seek  
252 to obtain a modified NDVI for estimating the biomass of dense vegetation under natural  
253 conditions.

## 254 **Conclusions**

255 This study developed a relatively accurate model for estimating AGB and tests the applicability of  
256 hyperspectral data from field and TM8 to map AGB on regional scales by a regression analysis  
257 method. The methodology we adopted in the study was a first attempt to Retrieval of vegetation  
258 biomass from ground hyperspectral remote sensing in Khorchin grassland.

259 The accuracy of ground spectral inversion is affected by many factors, and the quality of the selected

260 remote sensing image data has the greatest impact on the fitting accuracy of the model. Landsat 8  
261 satellite data is selected for remote sensing data, which has higher geometric accuracy and  
262 signal-to-noise ratio than previous Landsat data, which effectively expands the application range of  
263 image data. In the aspect of imaging mode, the sweep pendulum design of OLI imager has good  
264 stability and improves the image quality, and in the aspect of geometric accuracy, L1T data product is a  
265 data product after precise correction, and the product accuracy has been greatly improved. In this paper,  
266 TM8 data is used to retrieve vegetation biomass, and the results show that calculated  $R^2$  and SE and  
267 MEC values for various regression models vary among ground spectral models. By comparison,  
268 the exponential regression models we developed show a stronger relationship between spectral  
269 reflectance and ANPP. An exponential equation was optimal for estimating ANPP in the Khorchin  
270 grassland. Accuracy verification indicated that the relationship between the actual and predicted  
271 biomass was significant. Estimating ANPP with high accuracy based on NDVI derived from TM8  
272 satellite data is thus possible, which accumulates experience for the application of TM8 data in  
273 vegetation monitoring field.

274 The accuracy of this technique depends on living, green biomass and not on senesced or dead  
275 biomass, so the timing of the acquisition of NDVI data is critical, and the model can possibly be  
276 improved if models are developed per vegetation types and using a larger range of ground data. In  
277 brief, this research shows the usefulness of hyperspectral data from field and TM8 to evaluate  
278 aboveground biomass at very high precision to provide theoretical and data support for RS  
279 monitoring, grassland governance and ecological restoration.

## 280 **Acknowledgements**

281 We would like to thank Xueping Pan, Kun Wang, and Maorong Tian for their help with the  
282 collection and identification of the grasses, and thank Jixi Gao and Yanmei Chen for their help  
283 with guiding techniques and methods.

## 284 **References**

- 285 1. Darvishzadeh, R, Skidmore, A, Atzberger, C, Wieren, S. V. Estimation of vegetation LAI from hyperspectral  
286 reflectance data: effects of soil type and plant architecture. *International Journal of Applied Earth  
287 Observation and Geoinformation*. 2008;10(3):358-373. <https://doi.org/10.1016/j.jag.2008.02.005>.
- 288 2. Mutanga O, Skidmore A K. Hyperspectral band depth analysis for a better estimation of grass biomass  
289 (*Cenchrus ciliaris*) measured under controlled laboratory conditions. *International Journal of Applied Earth  
290 Observation and Geoinformation*. 2004;5(2):87-96. <https://doi.org/10.1016/j.jag.2004.01.001>.
- 291 3. M.A.Cho, A.Skidmore, F.Corsi, S.E.Van wieren, I.Sobhan. Estimation of green grass/herb biomass from  
292 airborne hyperspectral imagery using spectral indices and partial least squares regression. *International  
293 Journal of Applied Earth Observation and Geoinformation*. 2007;9(4):414–424  
294 <https://doi.org/10.1016/j.jag.2007.02.001>.
- 295 4. I.Numata, D.A.Roberts, O.A.Chadwick, J.P.Schimel, L.S.Galvao, J.V.Soares. Evaluation of hyperspectral  
296 data for pasture estimate in the Brazilian Amazon using field and imaging spectrometers. *Remote Sensing  
297 of Environment*. 2008; 112(4):1569-1583. <https://doi.org/10.1016/j.rse.2007.08.014>.
- 298 5. Gaia Vaglio Laurin, Johannes Balling, Piermaria Corona, Walter Mattioli, Dario Papale, Nicola Puletti,  
299 Maria Rizzo, John Truckenbrodt, Marcel Urban. Above-ground biomass prediction by  
300 Sentinel-1multitemporal data in central Italy with integration of ALOS2 and Sentinel-2 data. *Appl. Remote  
301 Sens*. 2018;12(1):016008. <https://doi.org/10.1117/1.JRS.12.016008>



- 302 6. M. Kenneth, M. Timothy, F. Lynn. Hyperspectral Mixture Modeling for Quantifying Sparse Vegetation Cover  
303 in Arid Environments. *Remote Sensing of Environment*. 2000; 72(3):360–374.  
304 [https://doi.org/10.1016/S0034-4257\(99\)00112-1](https://doi.org/10.1016/S0034-4257(99)00112-1).
- 305 7. X.F. Zhang, C.H. Liao, J. Li, Q. Sun. Fractional vegetation cover estimation in arid and semi-arid  
306 environments using HJ-1 satellite hyperspectral data. *International Journal of Applied Earth Observation*  
307 *and Geoinformation*. 2013; 21:506–512. <https://doi.org/10.1016/j.jag.2012.07.003>.
- 308 8. A. Ramoelo, A.K. Skidmore, M.A. Cho, R. Mathieu, I.M.A. Heitkönig, N. Dudeni-Tlhone, M. Schlerf,  
309 H.H.T. Prins. Non-linear partial least square regression increases the estimation accuracy of grass nitrogen  
310 and phosphorus using in situ hyperspectral and environmental data. *ISPRS Journal of Photogrammetry and*  
311 *Remote Sensing*. 2013;82:27–40. <https://doi.org/10.1016/j.isprsjprs.2013.04.012>.
- 312 9. S. Gao, Z. Niu, N. Huang X.H. Hou. Estimating the Leaf Area Index, height and biomass of maize using  
313 HJ-1 and RADARSAT-2. *International Journal of Applied Earth Observation and Geoinformation*. 2013;  
314 24, 1–8. <https://doi.org/10.1016/j.jag.2013.02.002>.
- 315 10. J.X. Gao, Y.M. Chen, Sh. H. Lü, Ch. Y. Feng, X.L. Chang, Sh. X. Ye, J.D. Liu. A ground spectral model for  
316 estimating biomass at the peak of the growing season in Hulunbeier grassland, Inner Mongolia, China.  
317 *International Journal of Remote Sensing*. 2012 ;33(13): 4029–4043.  
318 <https://doi.org/10.1080/01431161.2011.639401>.
- 319 11. T.J. Cai, C.Y. Ju, Y.F. Yao. Quantitative estimation of vegetation coverage in Mu Us sandy land based on  
320 RS and GIS. *Chinese Journal of Applied Ecology*. 2005;16(12):2301-2305 (in Chinese with English  
321 abstract). [http://en.cnki.com.cn/Article\\_en/CJFDTotal-STBC200302005.htm](http://en.cnki.com.cn/Article_en/CJFDTotal-STBC200302005.htm).
- 322 12. S. Eckert, M. Engesser. Assessing vegetation cover and biomass in restored erosion areas in Iceland using  
323 SPOT satellite data. *Applied Geography*. 2013;40: 179-190.  
324 <https://doi.org/10.1016/j.apgeog.2013.02.015>.
- 325 13. C.Y. Cao, D.M. Jiang, L.H. Zhu, Y.H. Nan. Degradation and diversity changes of meadow grassland in  
326 Keerqin Sandy Land. *Acta Prata Agriculturae Sinica*. 2006;15(3):18-26 (in Chinese with English abstract).  
327 [http://en.cnki.com.cn/Article\\_en/CJFDTotal-CYXB200603002.htm](http://en.cnki.com.cn/Article_en/CJFDTotal-CYXB200603002.htm).
- 328 14. T.N. Carlson, D.A. Ripley. On the relation between NDVI, fractional vegetation cover, and leaf area index.  
329 *Remote Sensing of Environment*. 1997;62:241–252. [https://doi.org/10.1016/S0034-4257\(97\)00104-1](https://doi.org/10.1016/S0034-4257(97)00104-1).
- 330 15. P.S. Thenkabail, R.B. Smith, E. De Pauw. Hyperspectral vegetation indices and their relationships with  
331 agricultural crop characteristics. *Remote Sensing of Environment*. 2000; 71:158–182.  
332 [https://doi.org/10.1016/S0034-4257\(99\)00067-X](https://doi.org/10.1016/S0034-4257(99)00067-X).
- 333 16. C.K. Wright, K.M. Beurs, G.M. Henebry. Combined analysis of land cover change and NDVI trends in the  
334 Northern Eurasian grain belt. *Frontiers of Earth Science*. 2012; 6(2):177-187.  
335 <https://doi.org/10.1007/s11707-012-0327-x>.
- 336 17. Y.Z. An, W. Gao, Z.Q. Gao, C.S. Liu, R.H. Shi. Trend analysis for evaluating the consistency of Terra  
337 MODIS and SPOT VGT NDVI time series products in China. *Frontiers of Earth Science*.  
338 2015;9(1):125-136. <https://doi.org/10.1007/s11707-014-0428-9>.
- 339 18. B. N. Holben, C.O. Justice. An examination of spectral band ratioing to reduce the topographic effect on  
340 remotely sense data. *International journal of remote sensing*. 1981; 2:115-133.  
341 <https://doi.org/10.1080/01431168108948349>.
- 342 19. Y.M. Chen, J.X. Gao, Z.Y. Diao, S.H. Lü, X.L. Chang, Z.Y. Feng. Spectral models for estimating grassland  
343 vegetation coverage on Hulunbeier grassland, Inner Mongolia, China. *China Environmental Science*.  
344 2010;30: 1287–1292 (in Chinese with English abstract).  
345 [http://en.cnki.com.cn/Article\\_en/CJFDTotal-ZGHJ201009033.htm](http://en.cnki.com.cn/Article_en/CJFDTotal-ZGHJ201009033.htm).

- 346 20. P. Sellers. Canopy reflectance, photosynthesis and transpiration. *Remote Sensing of Environment*. 1985;  
347 21:143–183. <https://doi.org/10.1080/01431168508948283>.
- 348 21. P. Sellers. Canopy reflectance, photosynthesis and transpiration. II. The role of biophysics in the linearity of  
349 the interdependence. *International journal of remote sensing*. 1987;6(8):1335–1372.
- 350 22. K. McGwire, Ti. Minor, L. Fenstermaker. Hyperspectral Mixture Modeling for Quantifying Sparse  
351 Vegetation Cover in Arid Environments. *Remote sensing of environment*. 2000; 72:360–374.  
352 [https://doi.org/10.1016/S0034-4257\(99\)00112-1](https://doi.org/10.1016/S0034-4257(99)00112-1).
- 353 23. O. Mutanga. Hyperspectral remote sensing of tropical grass quality and quantity. PhD thesis, Wageningen  
354 University, Wageningen, The Netherlands. Available online(2004) at:  
355 <http://library.wur.nl/wda/abstracts/ab3565.html>.
- 356 24. Chengming Zhang, Jiping Liu, Fan Yu, Shujing Wan, Yingjuan Han, Jing Wang, Gang Wang. Segmentation  
357 model based on convolutional neural networks for extracting vegetation from Gaofen-2 images. *Appl*  
358 *Remote Sens*. 2018;12(4):042804. <https://doi.org/10.1117/1.JRS.12.042804>.
- 359 25. O. Beerli, R. Phillips, J. Hendrickson, A.B. Frank, S. Kronberg. Estimating forage quantity and quality using  
360 aerial hyperspectral imagery for northern mixed-grass prairie. *Remote Sensing of Environment*. 2007;110:  
361 216–225. <https://doi.org/10.1016/j.rse.2007.02.027>.
- 362 26. F. Fava, R. Colombo, S. Bocchi, M. Meroni, M. Sitzia, N. Fois, C. Zucca. Identification of hyperspectral  
363 vegetation indices for Mediterranean pasture Characterization. *International Journal of Applied Earth*  
364 *Observation and Geoinformation*. 2009; 11:233–243. <https://doi.org/10.1016/j.jag.2009.02.003>.
- 365 27. C.J.Tucker. Red and photographic infrared linear combinations for monitoring vegetation. *Remote Sensing*  
366 *of Environment*. 1979; 8: 127–150. [https://doi.org/10.1016/0034-4257\(79\)90013-0](https://doi.org/10.1016/0034-4257(79)90013-0).
- 367 28. N.T. Boelman, M. Stieglitz, K.L. Griffin, G.R. Shaver. Interannual variability of NDVI in response to  
368 long-term warming and fertilization in wet sedge and tussock tundra. *Oecologia*. 2005; 143:588–597.  
369 <https://doi.org/10.1007/s00442-005-0012-9>.
- 370 29. X. Gao, A. Huete, W. Ni, T. Miura. Optical-biophysical relationships of vegetation spectra without  
371 background contamination. *Remote Sensing of Environment*. 2000; 74: 609–620.  
372 [https://doi.org/10.1016/S0034-4257\(00\)00150-4](https://doi.org/10.1016/S0034-4257(00)00150-4).
- 373 30. S.W. Todd, R.M. Hoffer. Responses of spectral indices to variations in vegetation cover and soil background.  
374 *Photogrammetric Engineering & Remote Sensing*. 1998; 64:915–921.
- 375 31. K. Kawamura. Quantifying grazing intensities using geographic information system and satellite remote  
376 sensing in the Xilingol steppe region, Inner Mongolia, China. *Agriculture, Ecosystems and Environment*.  
377 2005; 107:83–93. <https://doi.org/10.1016/j.agee.2004.09.008>.
- 378 32. A.R. Huete, C. J.Tucker. Investigation of soil influences in AVHRR red and near-infrared vegetation index  
379 imagery. *International journal of remote sensing*. 1991;12: 1223–1242.  
380 <https://doi.org/10.1080/01431169108929723>.
- 381 33. B.R. Zhao, C. Liu, A.J. Liu, Z.X. Wang. Estimate the yield of grassland using MODIS–NDVI – a case study  
382 of the grassland in Xilinguole in Inner Mongolia. *Pratacultural Science*. 2004; 21:12–14 (in Chinese with  
383 English abstract). [http://en.cnki.com.cn/Article\\_en/CJFDTOTAL-CYKX200408003.htm](http://en.cnki.com.cn/Article_en/CJFDTOTAL-CYKX200408003.htm).
- 384 34. Z.X. Wang, C. Liu, B.R. Zhao, A.J. Liu. ANPP estimate from Modis-EVI for the grassland region of  
385 Xilingol, China. *Journal of Lanzhou University (Natural Sciences)*. 2005; 41:10–16 (in Chinese with  
386 English abstract).  
387 [http://en.cnki.com.cn/article\\_en/cjfdtotal-ldzk200502003.htm](http://en.cnki.com.cn/article_en/cjfdtotal-ldzk200502003.htm).
- 388 35. Z.Q. Du, J. Wang, Y.D. Shen. Estimating model of grassland above-ground biomass based on Remote  
389 SensedData in Shandan County. *Remote Sensing Technology and Application*. 2006;21: 338–343(in

- 390 Chinese with English abstract). [http://en.cnki.com.cn/Article\\_en/CJFDTOTAL-YGJS200604012.htm](http://en.cnki.com.cn/Article_en/CJFDTOTAL-YGJS200604012.htm).
- 391 36. B.Xu, X.C. Yang. Calculation of grass production and balance of livestock carrying capacity in rangeland  
392 region of Northeast China. Geographical Research. 2009; 28:402–408 (in Chinese with English abstract).  
393 [http://en.cnki.com.cn/Article\\_en/CJFDTotal-DLYJ200902017.htm](http://en.cnki.com.cn/Article_en/CJFDTotal-DLYJ200902017.htm).
- 394 37. A. Swatantran, R. Dubayah, D. Roberts, M. Hofton, J.B. Blair. Mapping biomass and stress in the Sierra  
395 Nevada using lidar and hyperspectral data fusion. Remote Sensing of Environment.2011;115:2917–2930.  
396 <https://doi.org/10.1016/j.rse.2010.08.027>.
- 397 38. J.W. Rouse, R.H. Haas, D.W. Deering, J.A. Schell, J.C. Harlan. Monitoring the vernal advancement and  
398 retrogradation (green wave effect) of natural vegetation. NASA/GSFC Type III Final Report, Greenbelt,  
399 (1974). <https://ntrs.nasa.gov/search.jsp?R=19730017588>.
- 400 39. L.F. Jin, X.R.Xu, M.Zhang. The spectral reflectance model for estimation of green biomass of the typical  
401 grassland zone in inner Mongolia. Journal of Inner Mongolia University (Acta Scientiarum Naturalium  
402 Universitatis Neimongol).1986;17:735–740 (in Chinese with English abstract).  
403 [http://en.cnki.com.cn/Article\\_en/CJFDTotal-NMGX198604019.htm](http://en.cnki.com.cn/Article_en/CJFDTotal-NMGX198604019.htm).
- 404 40. P.J. Shi, B.Li, Z.H.Li, T.Hu. A research on the production estimation by remote sensing for large area  
405 grassland. Acta Agrestia Sinca.1994; 2: 9–12.(in Chinese with English abstract).  
406 [http://en.cnki.com.cn/Article\\_en/CJFDTOTAL-CDXU199401001.htm](http://en.cnki.com.cn/Article_en/CJFDTOTAL-CDXU199401001.htm).
- 407 41. Y.R.Wang, W.Y Yong. A correlative analysis between near-ground spectral reflectance and yield for Stipa  
408 gobica Desert-steppe. Journal of Inner Mongolia University (Acta Scientiarum Naturalium Universitatis  
409 Neimongol). 1996;27: 664–669 (in Chinese with English  
410 abstract).[http://en.cnki.com.cn/Article\\_en/CJFDTOTAL-NMGX605.017.htm](http://en.cnki.com.cn/Article_en/CJFDTOTAL-NMGX605.017.htm).
- 411 42. Mutanga, A.K.SKIDMORE. Narrow band vegetation indices overcome the saturation problem in biomass  
412 estimation. International Journal of Remote Sensing. 2004;25: 3999–4014.  
413 <https://doi.org/10.1080/01431160310001654923>.

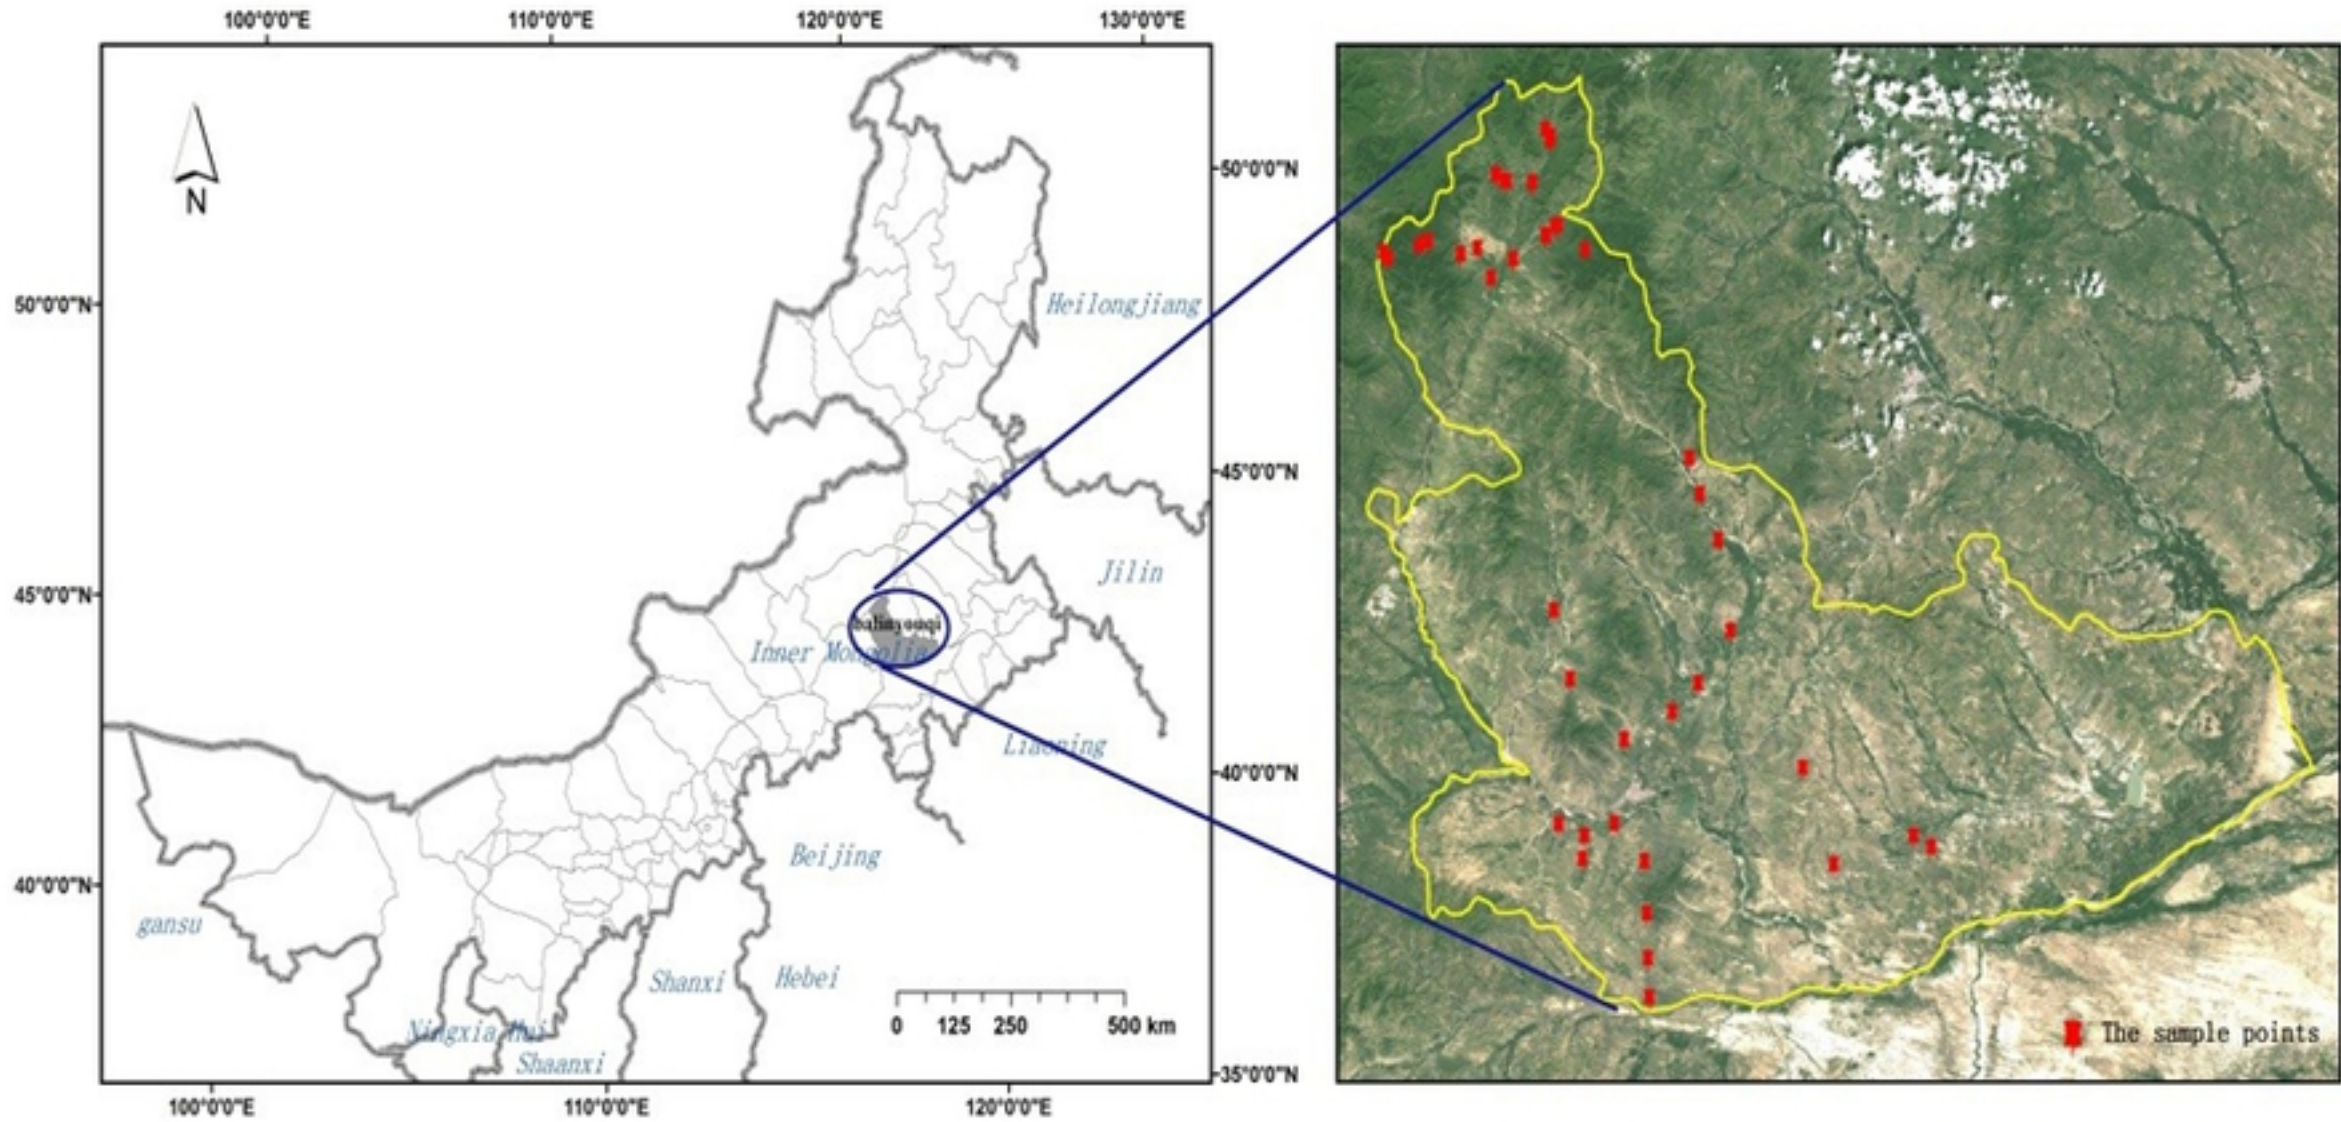

Figure

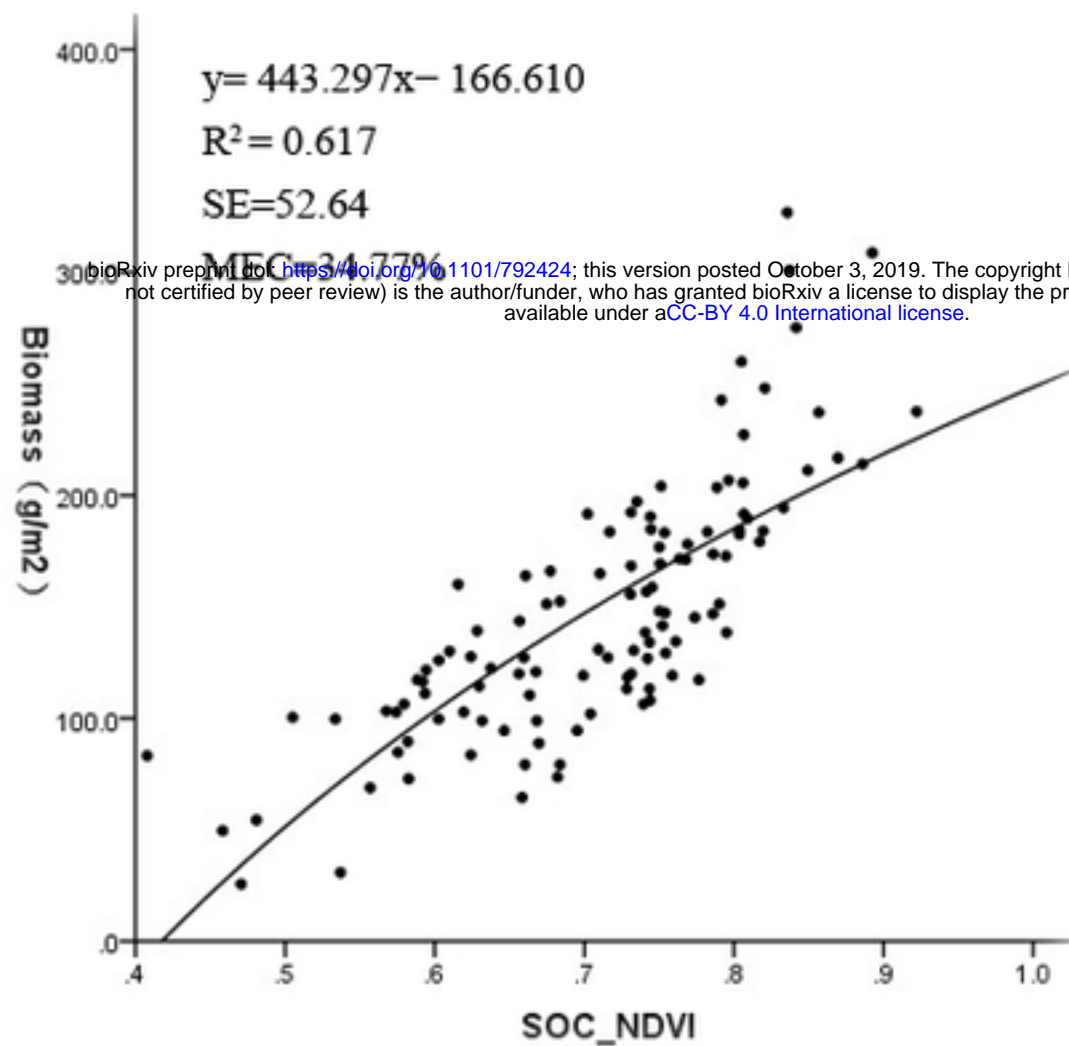

A. Linear

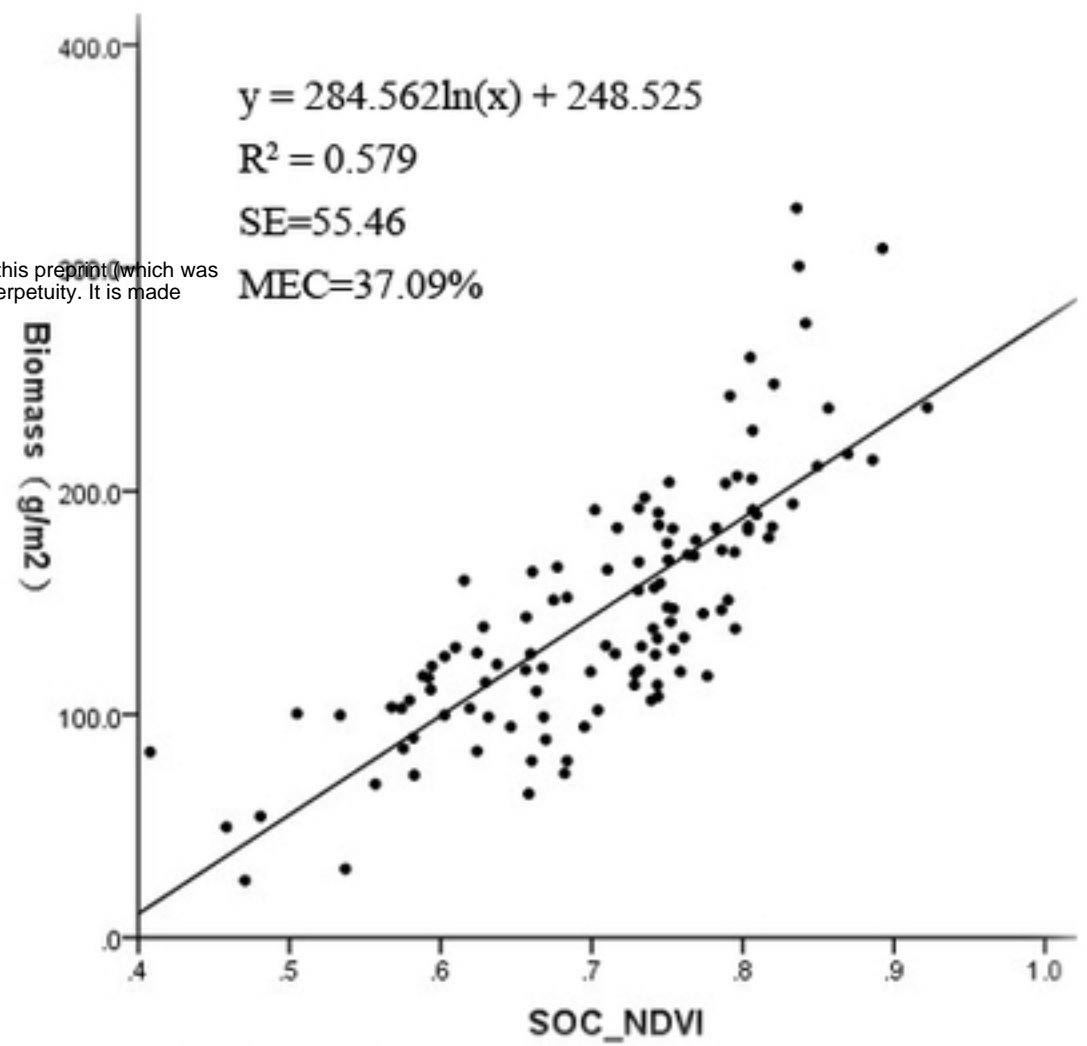

B. Logarithmic

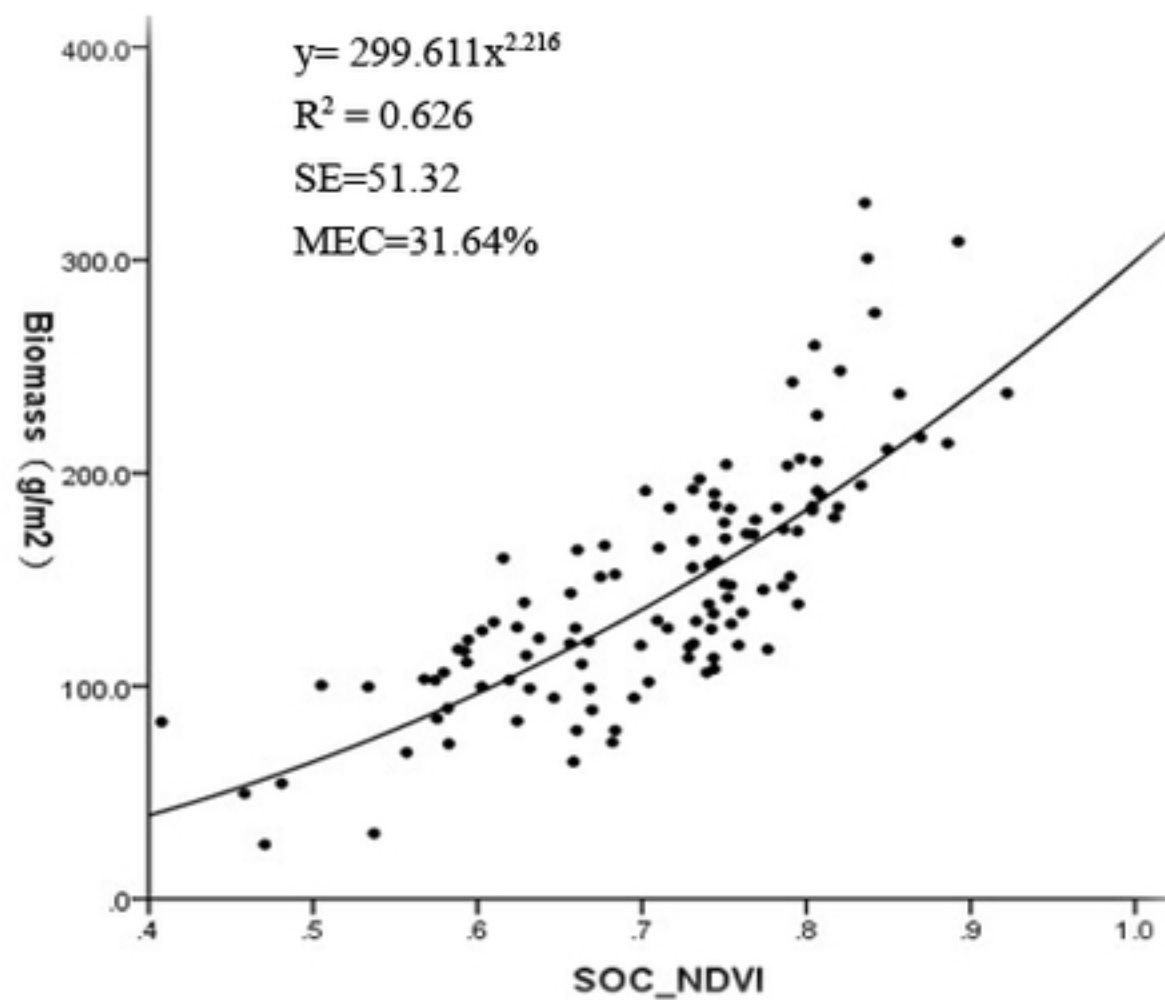

C. Power

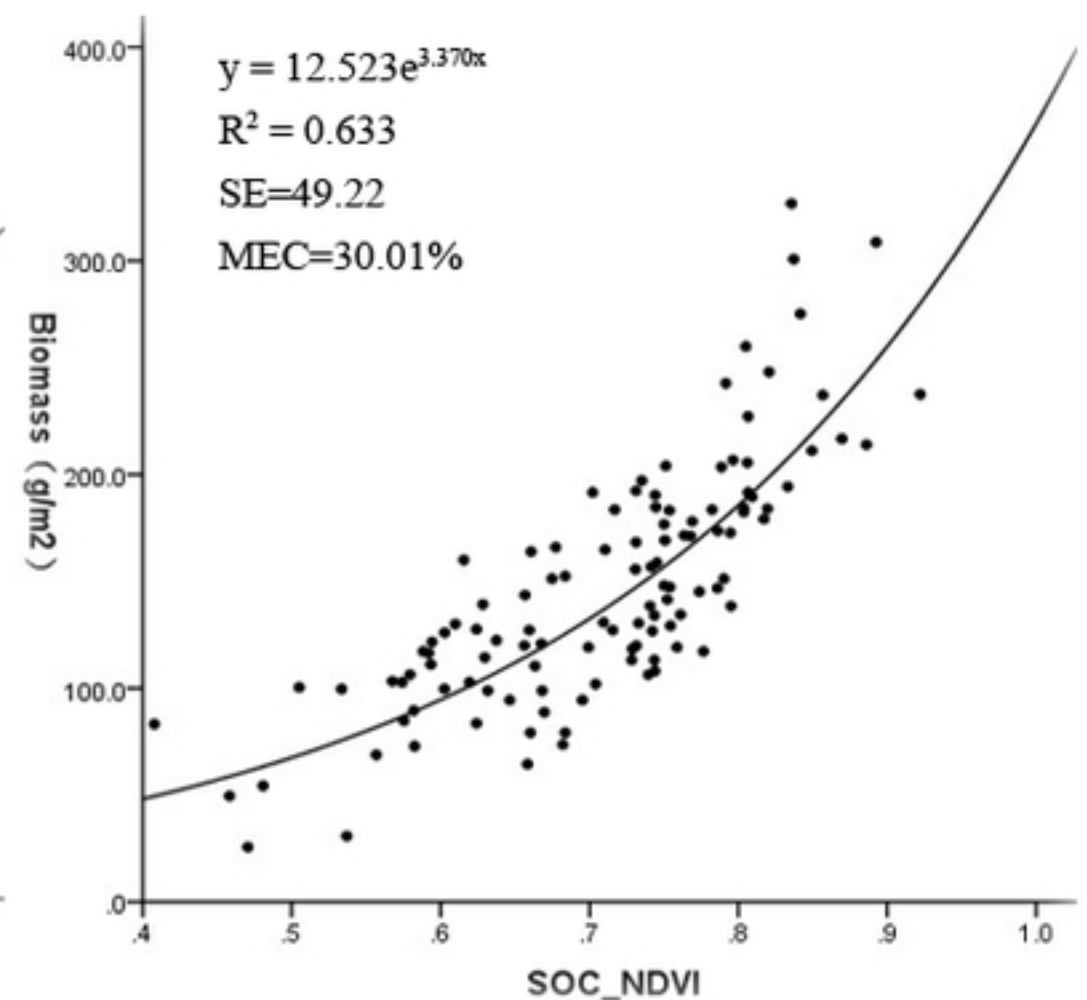

D. Exponential

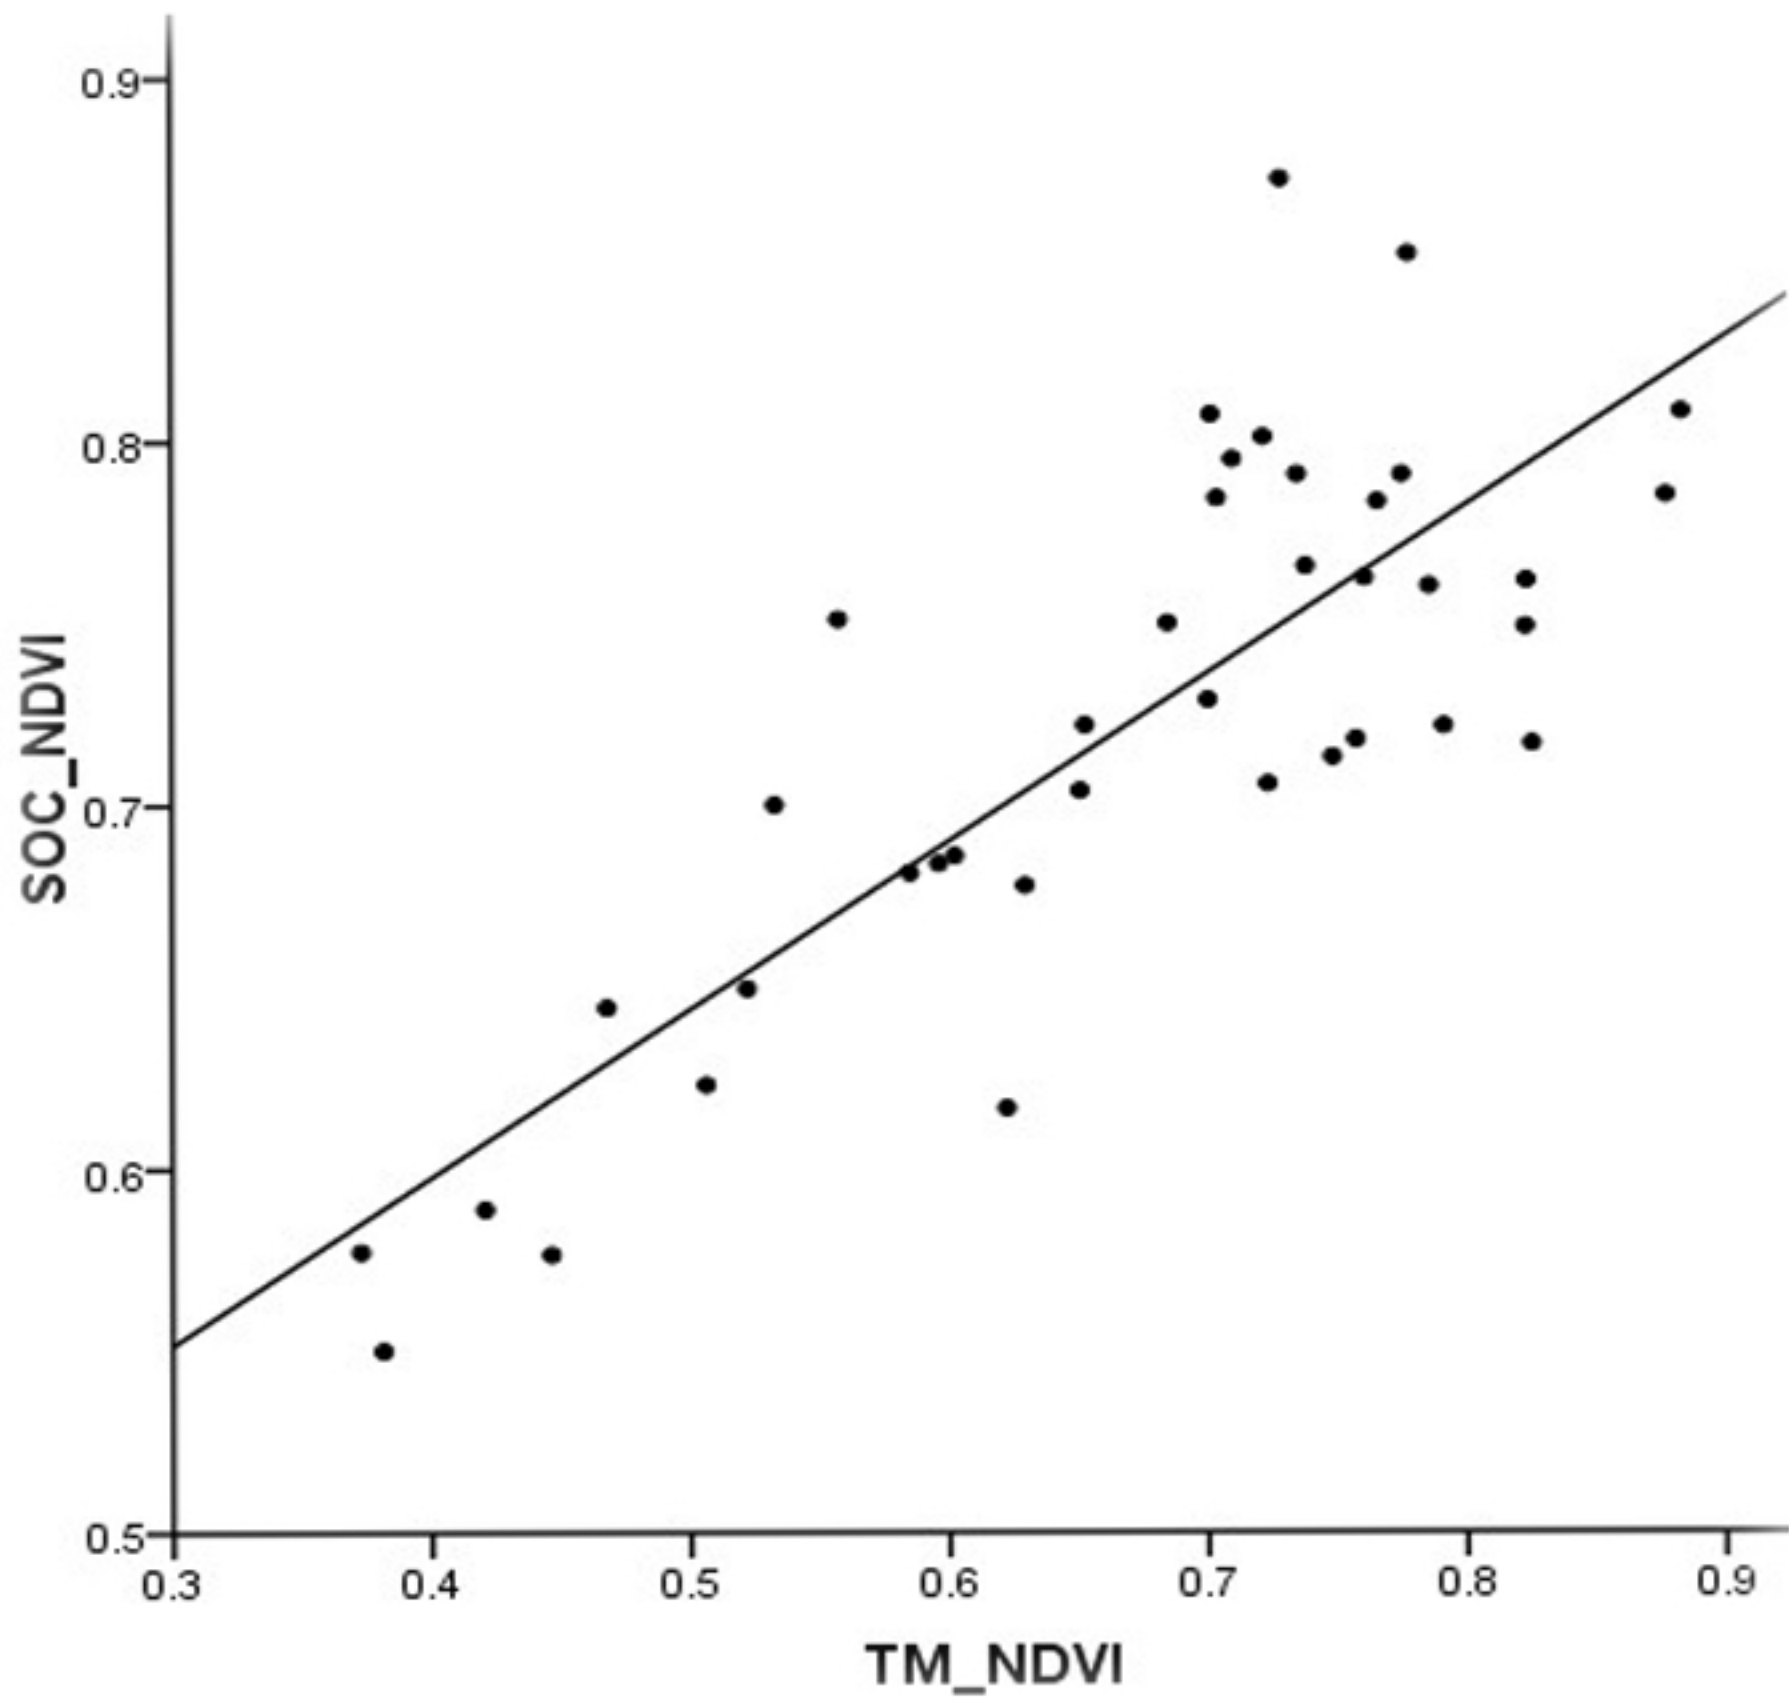

Figure3

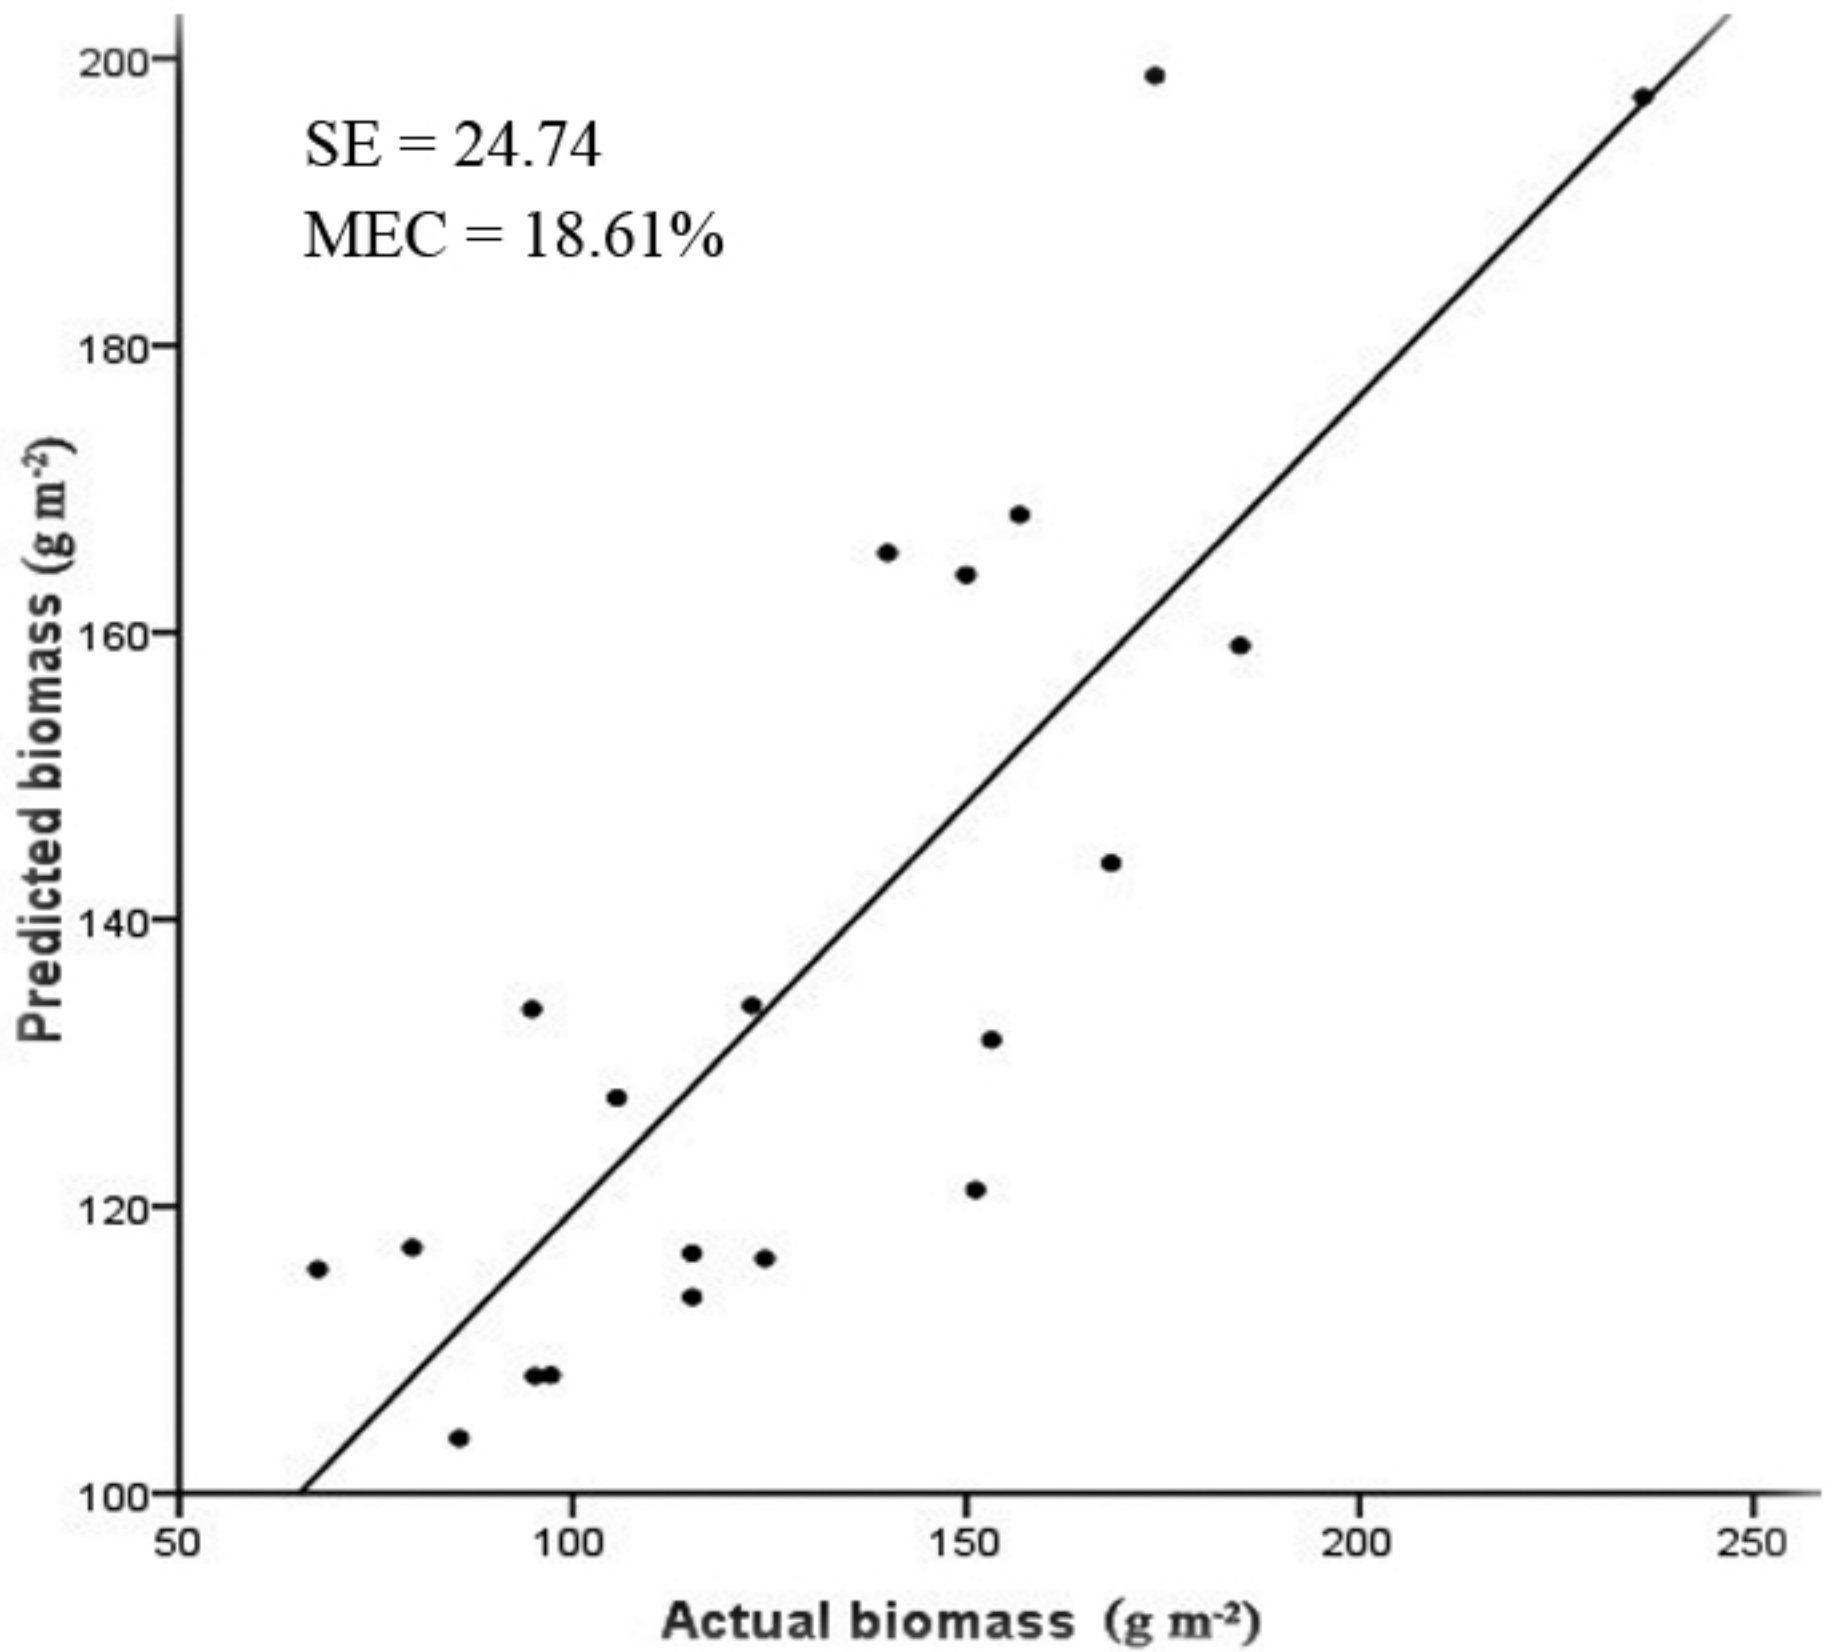

Figure4

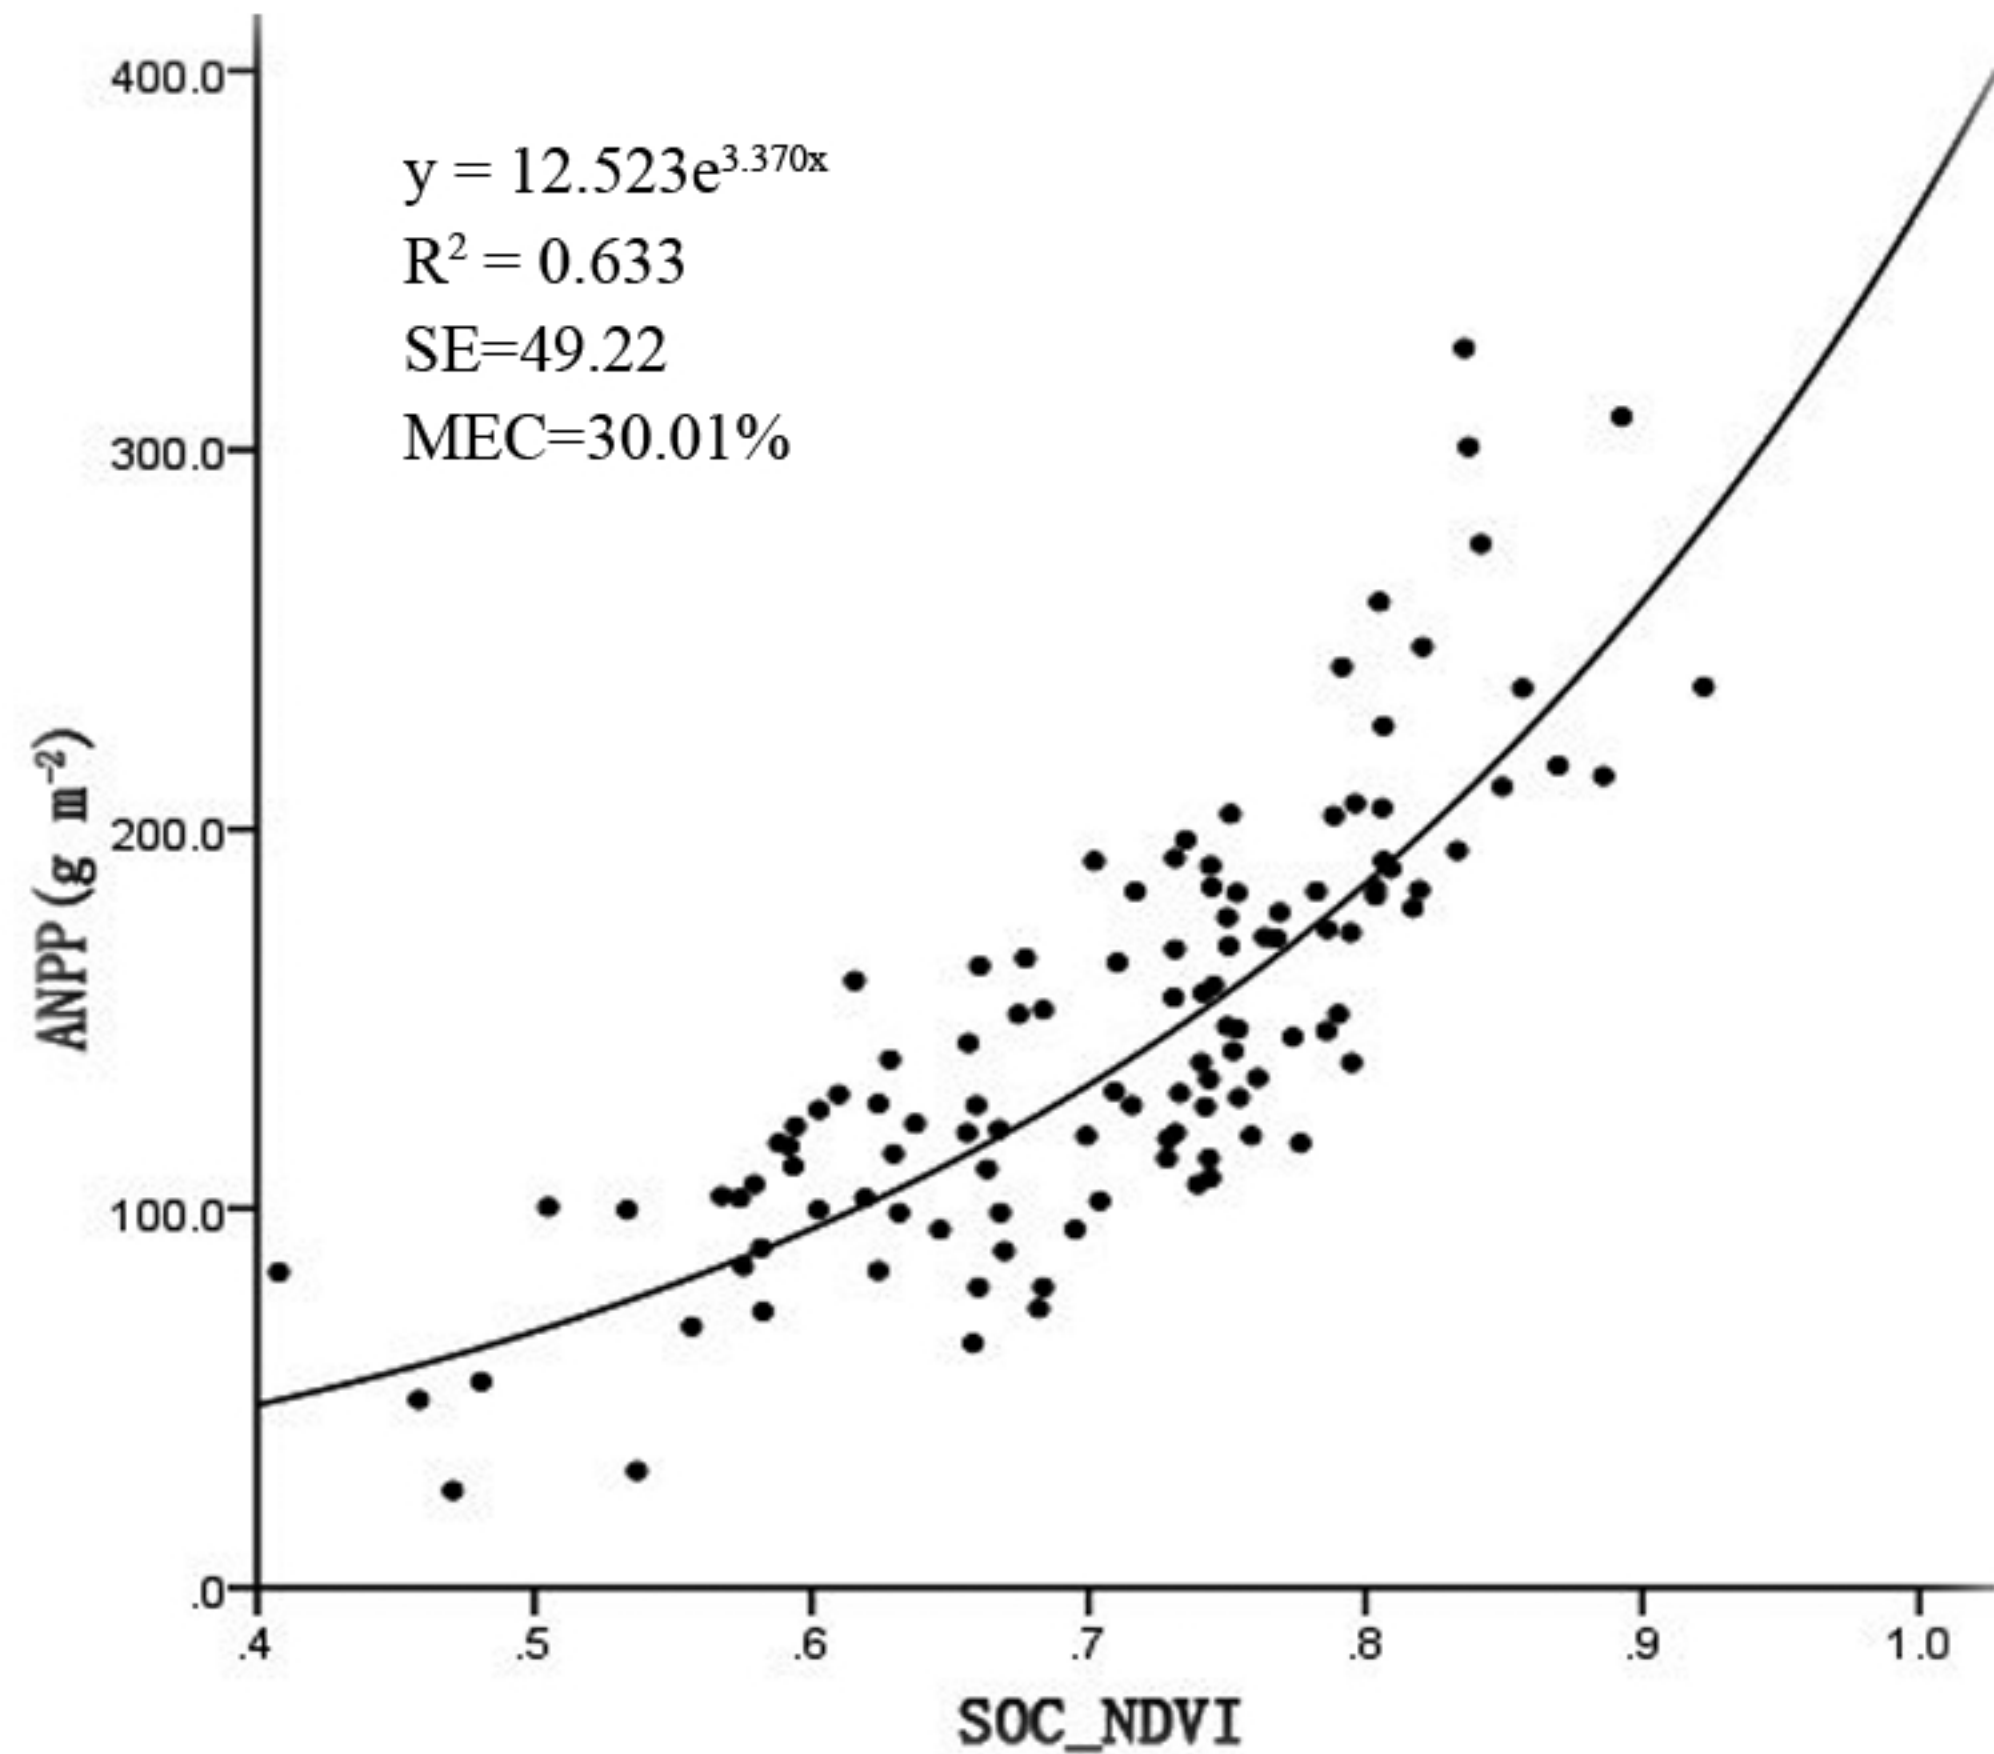

Figure5
